# Supplementary material for: High-energy flexible quasi-solid-state lithium-ion capacitors enabled by a freestanding rGO-encapsulated Fe3O4 nanocube anode and a holey rGO film cathode
Source: Royal Society of Chemistry journal article supplement (doi:10.1039/c8nr04292f), 2018-01-01
Supplement: c8nr04292f1.pdf [file c8nr04292f1.pdf]

## Electronic Supplementary Information

### **High-Energy Flexible Quasi-Solid-State Lithium-Ion Capacitors Enabled by Freestanding rGO-Encapsulated Fe<sub>3</sub>O<sub>4</sub> Nanocube anode and Holey rGO Film Cathode**

*Tian Liang, Huanwen Wang\*, Dongming Xu, Ke Liao, Rui Wang, Beibei He, Yansheng Gong,  
Chunjie Yan\**

Engineering Research Center of Nano-Geomaterials, Ministry of Education, Faculty of  
Material and Chemistry, China University of Geosciences, Lu Mo Road 388, Wuhan 430074,  
PR China

#### **Corresponding authors\*:**

[wanghw@cug.edu.cn](mailto:wanghw@cug.edu.cn) (H. W. Wang); [chjyan2005@126.com](mailto:chjyan2005@126.com) (C. J. Yan)

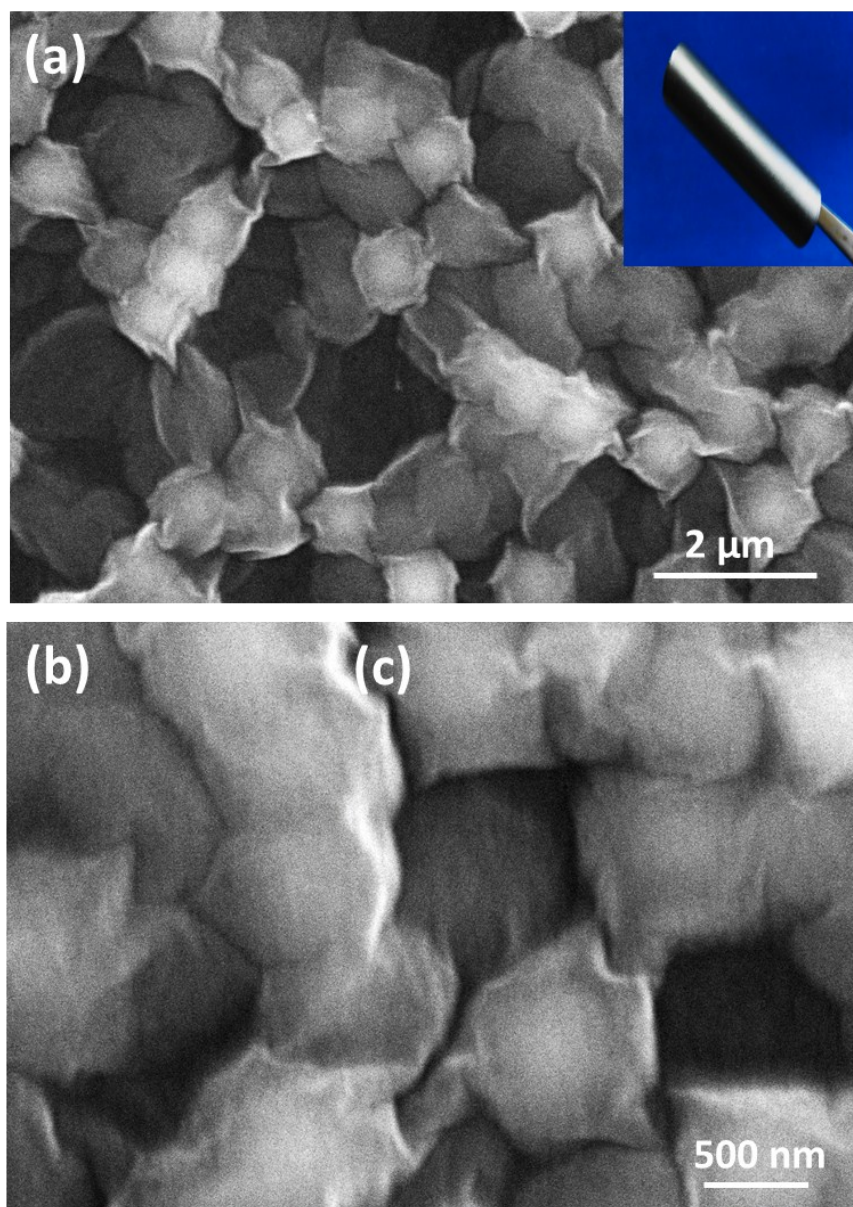

**Figure S1** SEM image (a, b) and the photograph (c) of the GO@Fe<sub>2</sub>O<sub>3</sub> film.

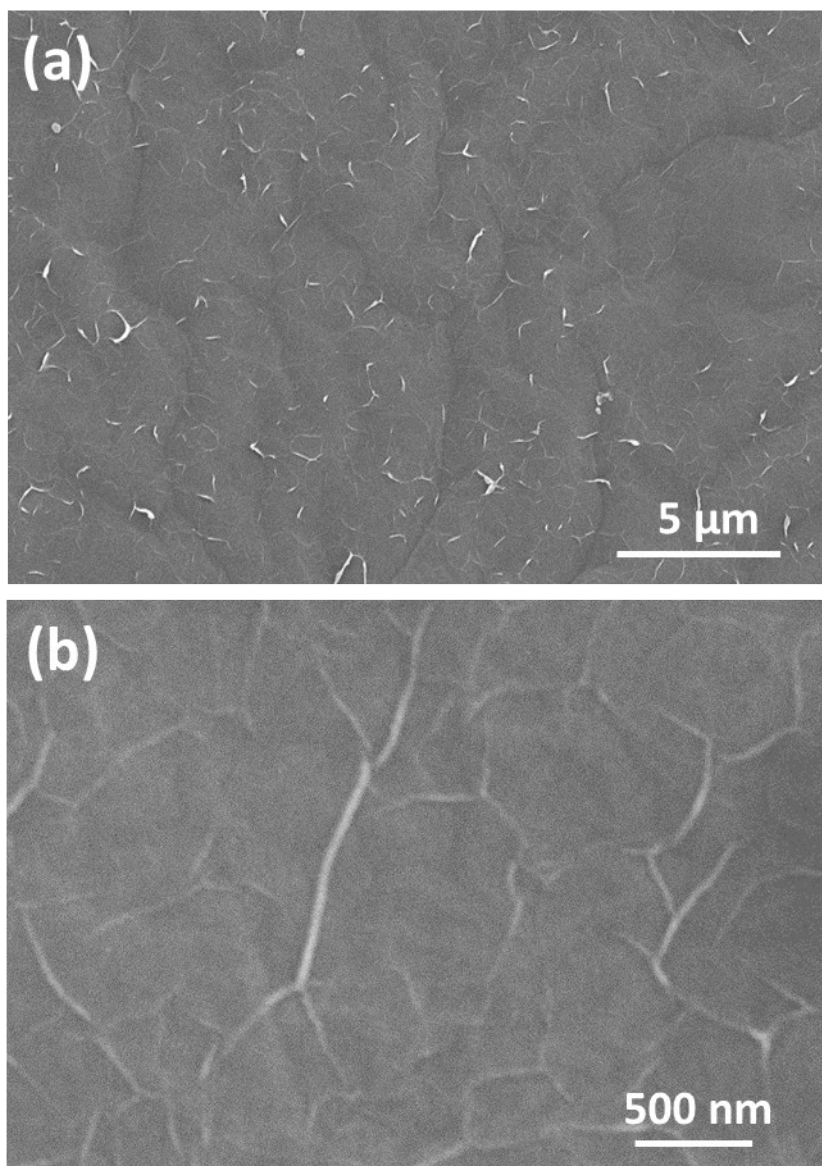

**Figure S2** SEM image (a, b) of the GO film.

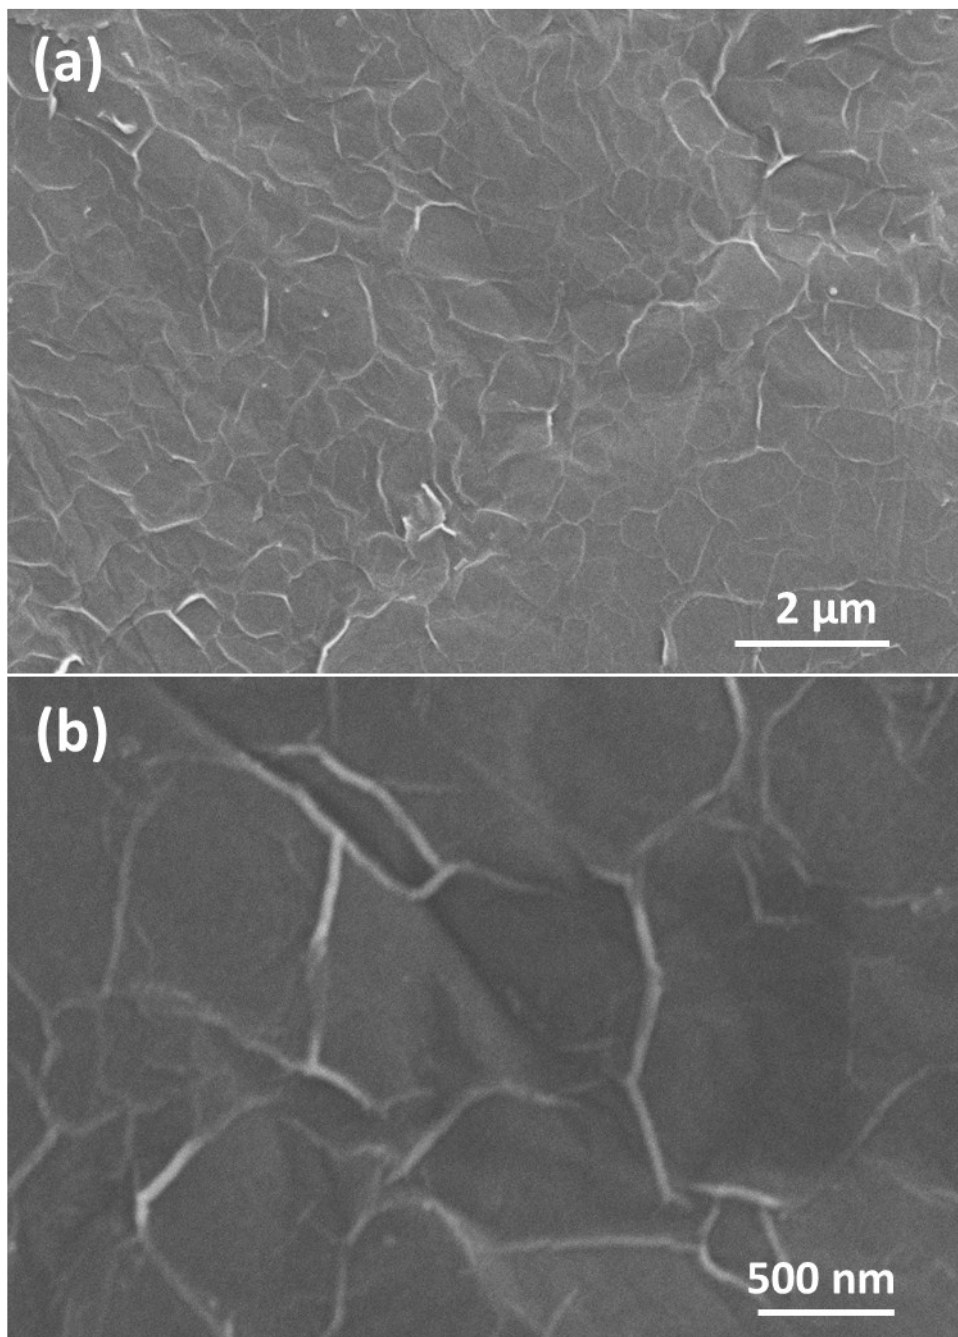

**Figure S3** SEM image (a, b) of the rGO film.

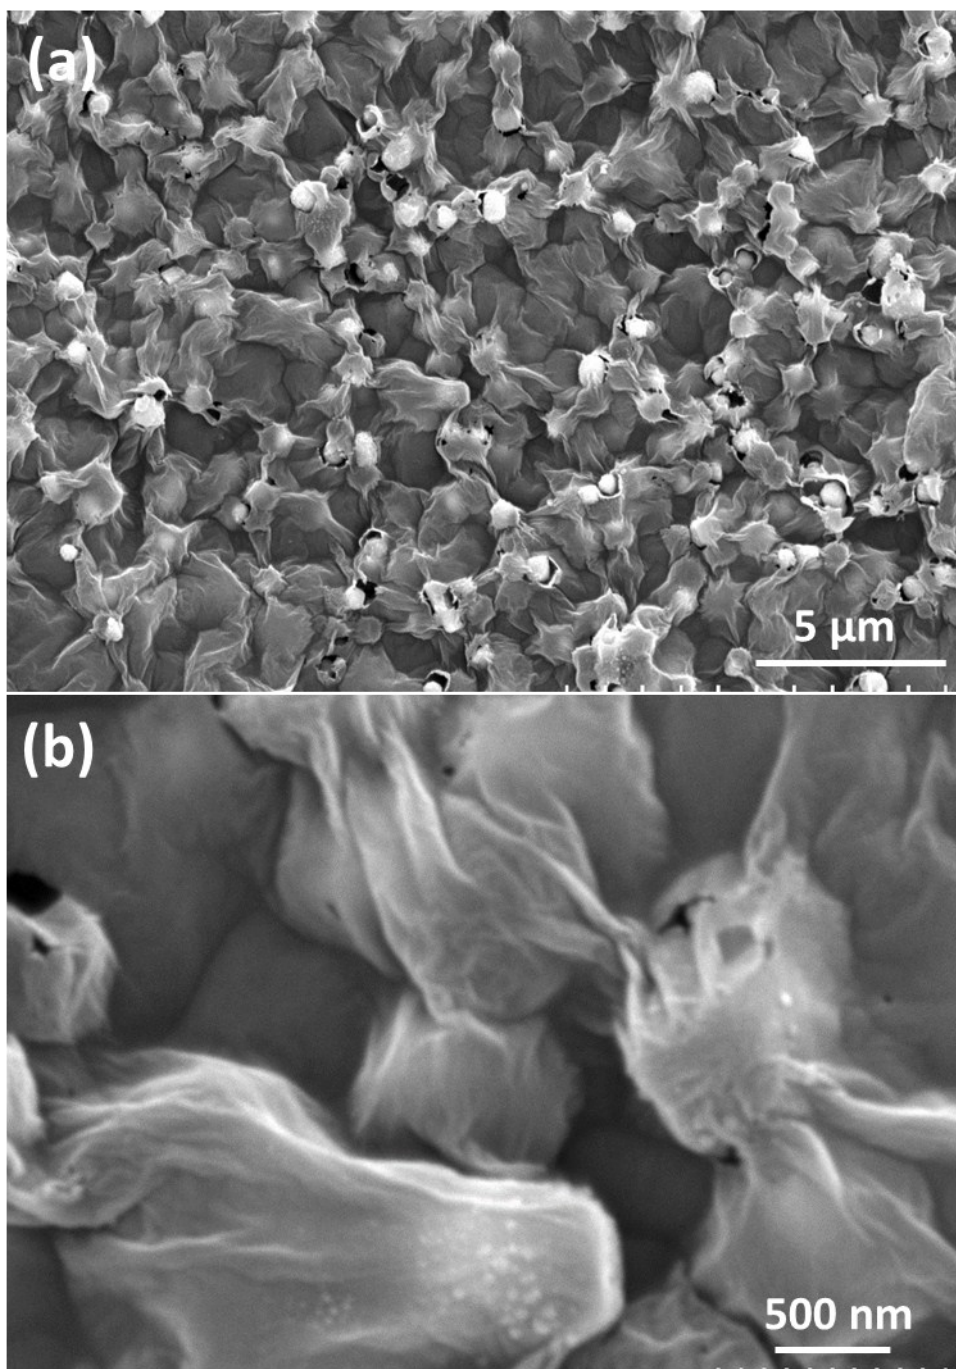

**Figure S4** SEM image (a, b) of the rGO@Fe<sub>3</sub>O<sub>4</sub> film, which was prepared by annealing GO@Fe<sub>2</sub>O<sub>3</sub> film at 900 °C in Ar atmosphere.

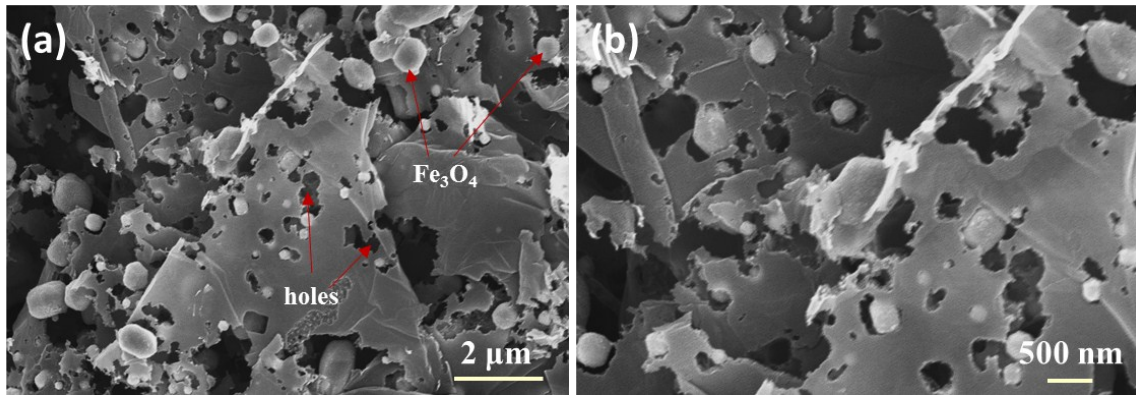

**Figure S5** SEM images (a, b) of the rGO@ $\text{Fe}_3\text{O}_4$  samples, which were prepared by annealing GO@haematite at  $900\ \text{°C}$  in Ar.

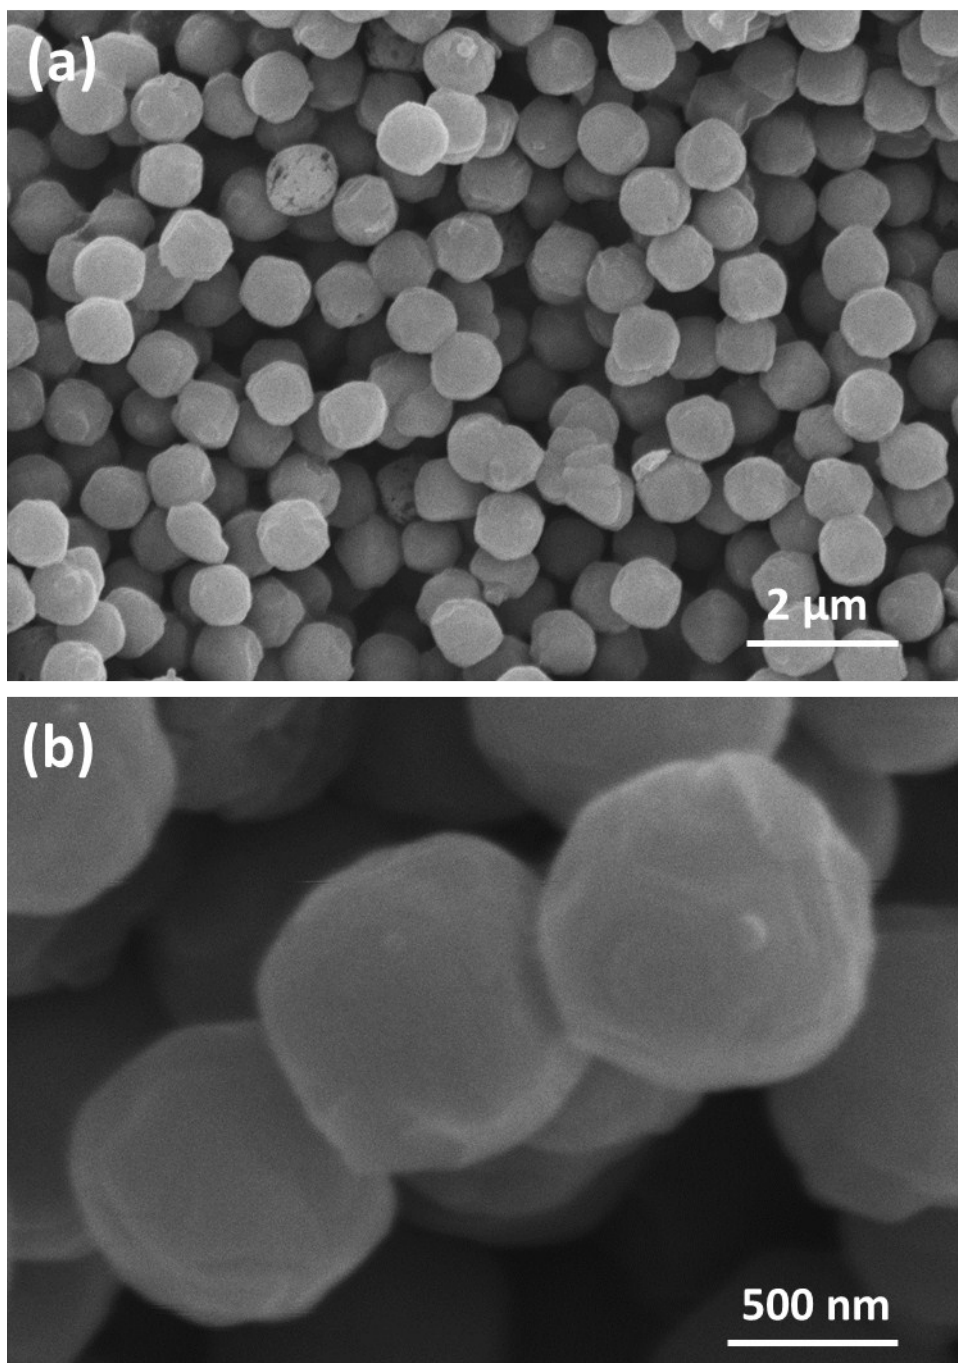

**Figure S6** SEM image (a, b) of the pure Fe<sub>3</sub>O<sub>4</sub> nanocubes, which was obtained by annealing Fe<sub>2</sub>O<sub>3</sub> nanocubes at 650 °C.

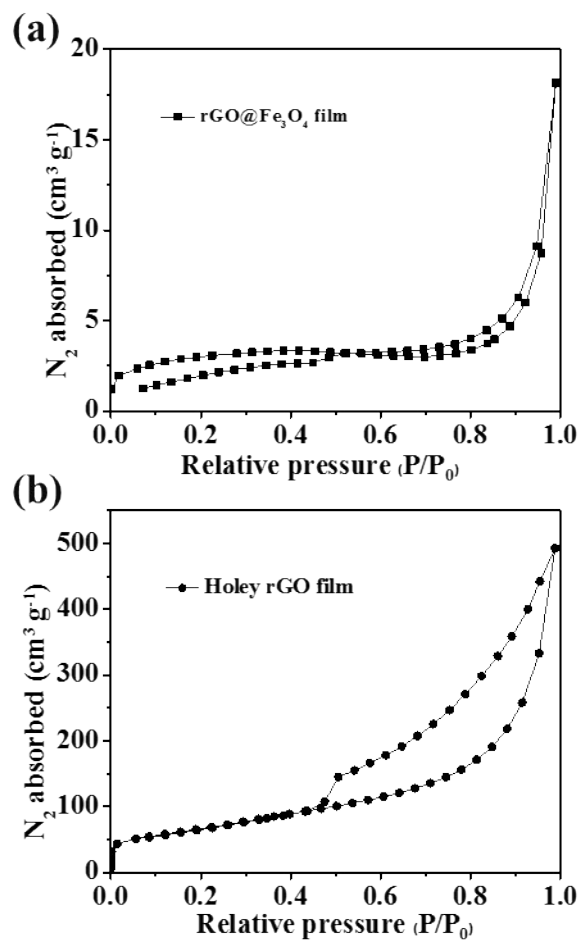

**Figure S7** Nitrogen adsorption isotherms of (a) rGO@Fe<sub>3</sub>O<sub>4</sub> and (b) holey rGO.



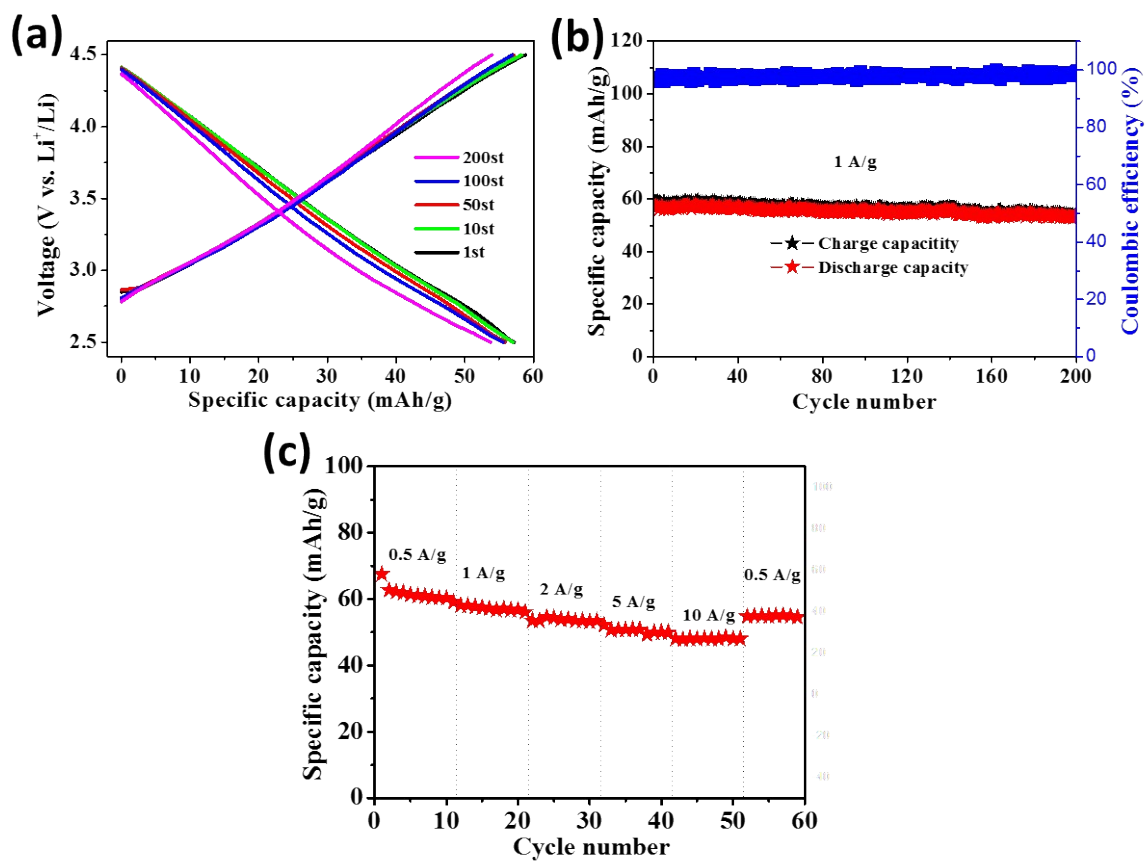

**Figure S8** Charge-discharge curves (a) at 1 A g<sup>-1</sup>, cycling performance (b) at 1 A g<sup>-1</sup>, and rate capability (c) of holey rGO film.

**Table S1** Electrochemical performances of various LICs in references.

| Hybrid System<br>(anode//cathode)                                   | Power Density<br>(W kg <sup>-1</sup> ) | Energy Density<br>(Wh kg <sup>-1</sup> ) | Ref.     |
|---------------------------------------------------------------------|----------------------------------------|------------------------------------------|----------|
| CC@NiCo <sub>2</sub> O <sub>4</sub> //Graphene                      | 568.2                                  | 60.9                                     | 1        |
|                                                                     | 11360                                  | 37.56                                    |          |
| CNT@V <sub>2</sub> O <sub>5</sub> //AC                              | 210                                    | 40                                       | 2        |
|                                                                     | 6300                                   | 6.9                                      |          |
| Graphene@Fe <sub>2</sub> O <sub>3</sub> //Graphene                  | 200                                    | 121                                      | 3        |
|                                                                     | 18000                                  | 60.1                                     |          |
| Graphene@Fe <sub>3</sub> O <sub>4</sub> //Graphene                  | 5                                      | 204                                      | 4        |
|                                                                     | 1000                                   | 122                                      |          |
| Graphene@TiO <sub>2</sub> //Graphene                                | 303                                    | 72                                       | 5        |
|                                                                     | 2000                                   | 10                                       |          |
| PF-Graphene//Graphene                                               | 141                                    | 148.3                                    | 6        |
|                                                                     | 7800                                   | 71.5                                     |          |
| Graphene-Li <sub>4</sub> Ti <sub>5</sub> O <sub>12</sub> //Graphene | 45                                     | 95                                       | 7        |
|                                                                     | 3000                                   | 32                                       |          |
| C-LiTi <sub>2</sub> (PO <sub>4</sub> ) <sub>3</sub> // AC           | -                                      | 14                                       | 8        |
|                                                                     | 180                                    | -                                        |          |
| Nb <sub>2</sub> O <sub>5</sub> -C//AC                               | -                                      | 74                                       | 9        |
|                                                                     | 18510                                  | 15                                       |          |
| TiP <sub>2</sub> O <sub>7</sub> //AC                                | 46                                     | 13                                       | 10       |
|                                                                     | 371                                    | -                                        |          |
| MnNCN//AC                                                           | -                                      | 103                                      | 11       |
|                                                                     | 8533                                   | -                                        |          |
| Li <sub>3</sub> VO <sub>4</sub> -CNFs//Graphene                     | 173                                    | 110                                      | 12       |
|                                                                     | 3870                                   | -                                        |          |
| rGO@Fe <sub>3</sub> O <sub>4</sub> //rGO                            | 250                                    | 148.75                                   | Our work |
|                                                                     | 25000                                  | 70.5                                     |          |

## References

- 1 Z. Gao, W. Yang, J. Wang, N. Song and X. Li, *Nano Energy*, 2015, **13**, 306-317.
- 2 Z. Chen, V. Augustyn, J. Wen, Y. Zhang, M. Shen, B. Dunn and Y. Lu, *Adv Mater*, 2011, **23**, 791-795.
- 3 E. Kim, H. Kim, B. J. Park, Y. H. Han, J. H. Park, J. Cho, S. S. Lee and J. G. Son, *Small*, 2018, **14**, e1704209.
- 4 F. Zhang, T. Zhang, X. Yang, L. Zhang, K. Leng, Y. Huang and Y. Chen, *Energy Environ Sci*, 2013, **6**, 1623.
- 5 F. Wang, C. Wang, Y. Zhao, Z. Liu, Z. Chang, L. Fu, Y. Zhu, Y. Wu and D. Zhao, *Small*, 2016, **12**, 6207-6213.
- 6 T. Zhang, F. Zhang, L. Zhang, Y. Lu, Y. Zhang, X. Yang, Y. Ma and Y. Huang, *Carbon*, 2015, **92**, 106-118.
- 7 K. Leng, F. Zhang, L. Zhang, T. Zhang, Y. Wu, Y. Lu, Y. Huang and Y. Chen, *Nano Research*, 2013, **6**, 581-592.
- 8 V. Aravindan, W. Chuiling, M. V. Reddy, G. V. Rao, B. V. Chowdari and S. Madhavi, *Phys Chem Chem Phys*, 2012, **14**, 5808-5814.
- 9 K. H. Lim E, Jo C, et al., *ACS Nano*, 2014, **8**, 8968-8978.
- 10 V. Aravindan, M. V. Reddy, S. Madhavi, S. G. Mhaisalkar, G. V. Subba Rao and B. V. R. Chowdari, *J Power Sources*, 2011, **196**, 8850-8854.
- 11 C. Liu, C. Zhang, H. Fu, X. Nan and G. Cao, *Adv Energy Mater*, 2017, **7**, 1601127.
- 12 F. Wang, Z. Liu, X. Yuan, J. Mo, C. Li, L. Fu, Y. Zhu, X. Wu and Y. Wu, *J Mater Chem A*, 2017, **5**, 14922-14929.
